# Supplementary material for: Dynamics and origin of rebound viremia in SHIV-infected infant macaques following interruption of long-term ART
Source: JCI journal article supplement (doi:10.1172/jci.insight.152526), 2021-10-26
Supplement: sd1 [file 1]

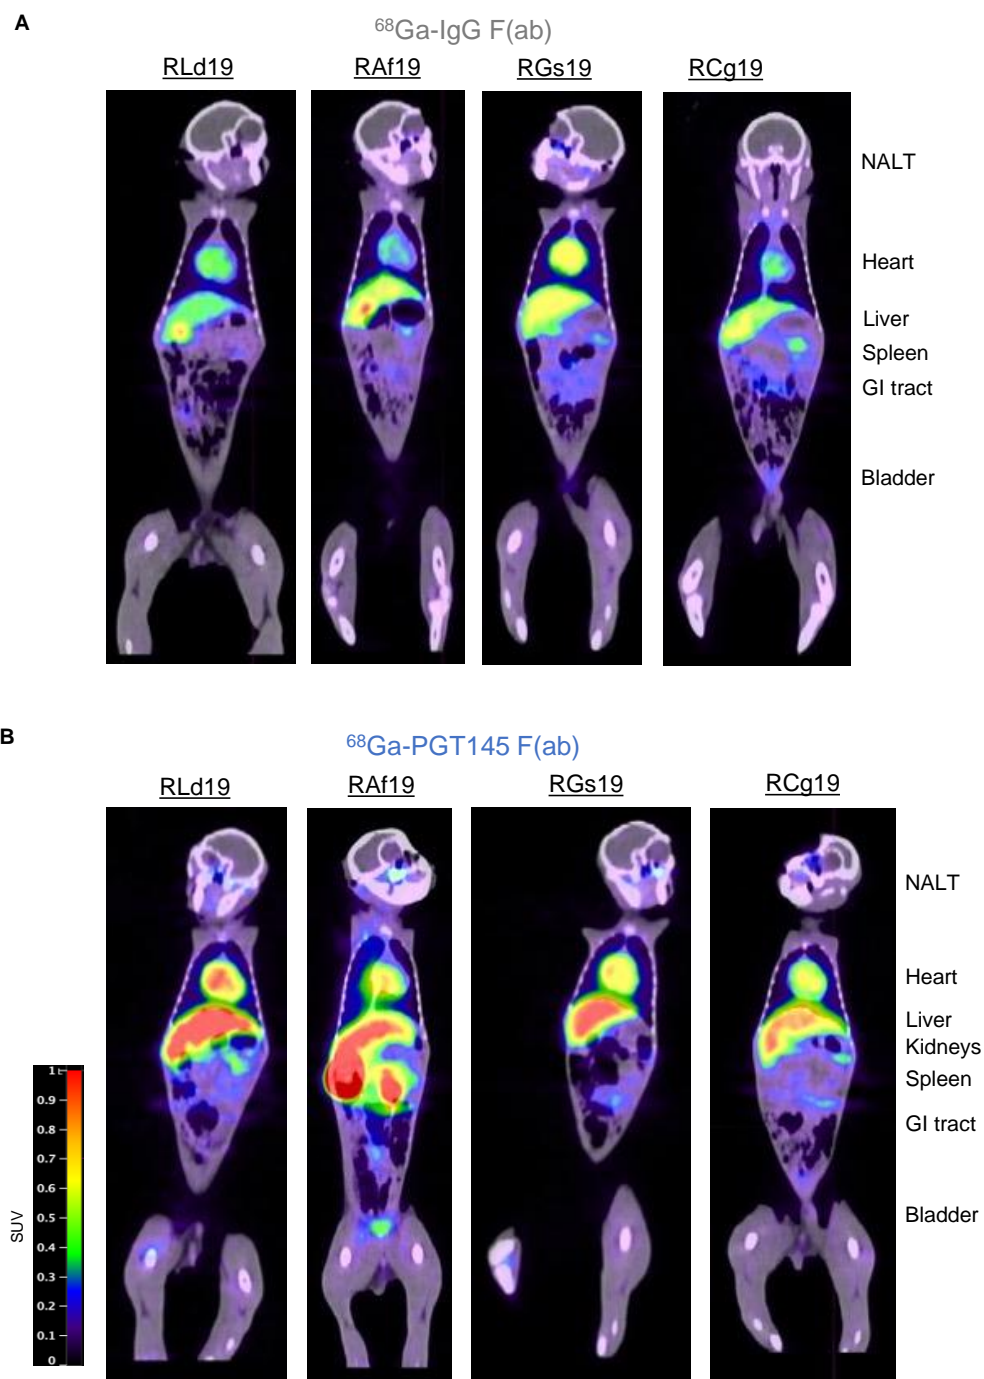

**Supplemental Figure 1. ImmunoPET scans to assess  $^{68}\text{Ga}$  and PGT145 background signal.** Representative standard uptake value (SUV) maps from four SHIV.C.CH505-infected ART-suppressed infant rhesus macaques imaged with (A)  $^{68}\text{Ga}$ -IgG F(ab) or (B)  $^{68}\text{Ga}$ -PGT145 F(ab) probe after >32 weeks on ART without interruption. Images show frontal views. Images are from a single plane, all organs may not be visible in the same view. *NALT*: nasal-associated lymphoid tissue; *Ax LN*: axillary lymph node; *GI tract*: gastrointestinal tract

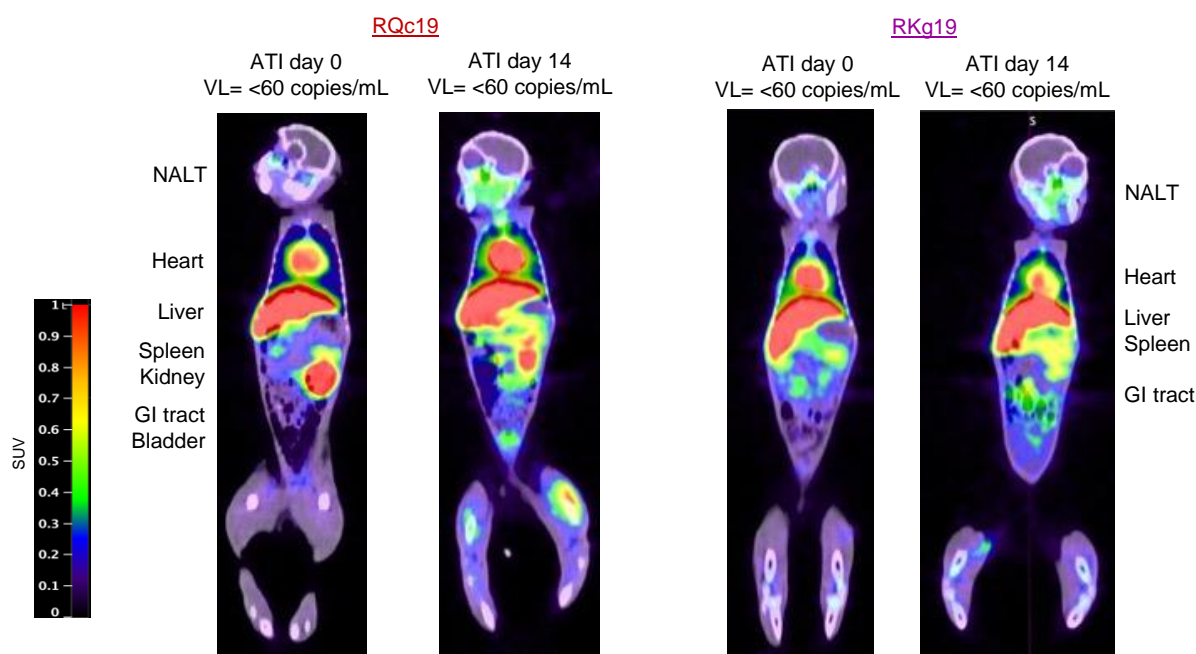

**Supplemental Figure 2. ImmunoPET scans with  $^{68}\text{Ga}$ -PGT145 F(ab) following ART interruption.** Standard uptake value (SUV) maps from two SHIV.C.CH505-infected infant rhesus macaques imaged with  $^{68}\text{Ga}$ -PGT145 F(ab). Representative images show frontal views from scans performed at 0 and 14 days post-ATI. Images are from a single plane, all organs may not be visible in the same view. Plasma viral loads (VL) at the time of each scan are indicated above images. *NALT*: nasal-associated lymphoid tissue; *Ax LN*: axillary lymph node; *GI tract*: gastrointestinal tract

**Supplemental Table 1. Number of sequences obtained by SGA**

| <b>Animal ID</b> | <b>Pre-ART<br/>Plasma</b> | <b>Post-ATI<br/>Plasma</b> | <b>RB<br/>CD4+ T</b> | <b>LN<br/>CD4+ T</b> | <b>PB<br/>CD4+ T</b> |
|------------------|---------------------------|----------------------------|----------------------|----------------------|----------------------|
| RLg19            | 12                        | 17                         | 6                    | 7                    | 9                    |
| RVh19            | 10                        | 9                          | 6                    | 4                    | 16                   |
| RJm19            | 11                        | 7                          | 1                    | 4                    | 6                    |
| RRm19            | 13                        | 13                         | 1                    | 13                   | 11                   |
